# Supplementary material
Source: publisher site journal article supplement (https://www.dovepress.com/article/228951)
Supplement: Supplementary file 1 [file get_supplementary_file.php]

Supplementary material 1


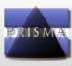
**PRISMA 2009 Checklist**

| **Section/topic** | **#** | **Checklist item** | **Reported on page #** |
| --- | --- | --- | --- |
| **TITLE** | | |  |
| Title | 1 | How effective are mentorship programs for improving health worker competence and institutional performance in Africa? A systematic review of quantitative evidence (Page 1) |  |
| **ABSTRACT** | | |  |
| Structured summary | 2 | **Introduction**: Mentorship programs are frequently recommended as innovative and low cost solutions and these have been implemented in many healthcare institutions to tackle multiple human resource-related challenges. This review sought to locate, appraise and describe the literature reporting on mentorship programs targeted at improving healthcare worker competence and institutional performance in Africa.  **Methods:** This review searched and synthesized reports from studies that assessed the effectiveness of mentorship programs among healthcare workers in Africa. We included health professionals of any type and education level, working in any type of healthcare facility and acting as a mentee or mentor. We searched for studies reported in the English language in EMBASE, CINAHL, COCHRANE and MEDLINE. Additional search was conducted in Google scholar.  **Results**: We included thirty papers reporting on 24 studies. Diverse approaches of mentorship were reported: a) placing a mentor in health facility for a period of time (embedded mentor), b) visits by a mobile mentor, c) a mentorship approach involving a team of mobile multidisciplinary mentors, d) facility twinning, and e) within-facility mentorship by a focal person or a manager.  **Implication for practice:** Mentorship interventions were effective in improving the clinical management of infectious diseases, maternal, neonatal and childhood illnesses. Mentoring interventions were also found to improve managerial performance (accounting, human resources, monitoring and evaluation, and transportation management) of health institutions. Additionally, mentoring had improved laboratory accreditation scores. Mentorship interventions may be used to increase adherence of health professionals to guidelines, standards and protocols. While different types of interventions (embedded mentoring, visits by mobile mentors, facility twinning and within-facility mentorship by a focal person) were reported to be effective, there is no evidence to recommend one model of mentorship over other types of mentorship.  **Implications for research:** Further research—experimental methods measuring the impact of different mentorship formats and longitudinal studies establishing their longer-term effectiveness—is required to compare the effectiveness and cost effectiveness of different models of mentorship. Further studies are needed to explore why and how different mentoring programmes succeed and the meaningfulness of mentorship programs for the different stakeholders are also required. (**Page** **2**) |  |
| **INTRODUCTION** | | |  |
| Rationale | 3 | Globally, there is emerging evidence that some mentoring programs have reduced turnover rates, employee turnover costs and medical negligence rates and improved job satisfaction, communication skills and professional identity [21]. Primary research from several African countries have indicated that mentorship interventions are effective in improving the quality of integrated management of neonatal and childhood illness (IMNCI) services [22], increasing knowledge and competence in the management of HIV and tuberculosis [4, 8], reproductive health [4], antenatal care, labor and delivery [19].  However, the experience of implementing mentorship programs in Africa has not been systematically appraised and synthesized to inform policy and practice. Hence, there is only limited evidence providing clarity on how to design well performing mentorship programs and integrate these into the structure of health systems [3]. The approaches to delivery of the programs, the selection criteria for mentors and frequency and nature of interaction between mentor and mentee required for mentorship programs may affect the effectiveness of mentorship programs, and it is imperative to employ types of mentorship programs that are found to be effective. Through a preliminary search in PubMed, CINAHL, EMBASE, Cochrane database of systematic reviews (CDSR), Database of abstracts of reviews of effectiveness (DARE), JBI Database of systematic reviews and implementation reports, we did not find any systematic review addressing effectiveness of mentorship interventions in African countries, especially for the African context. Recognizing this knowledge gap, this review sought to locate, appraise and synthesize evidence published in the international literature reporting on the effectiveness of mentorship programs in improving clinical competence of the healthcare workers and the performance of health facilities in Africa. Based on the evidence generated from this review, mentorship programs could be designed to assist health facilities in improving health facility leadership and governance for better service management and delivery. **(Pages 3-4)** |  |
| Objectives | 4 | This review sought to locate, appraise and describe the literature reporting on mentorship programs targeted at improving healthcare worker competence and institutional performance in Africa.(**Page 2 and page 4)** |  |
|  | | |  |
| Protocol and registration | 5 | The review was conducted based on an a-priori protocol registered on PROSPERO (Registration number: CRD42018096366). **(Page 4)** |  |
| Eligibility criteria | 6 | The eligibility criteria for the review are as follows.Population In this review, health professionals of any type and any education level working in any type of healthcare facility acting as a mentee or mentor were considered for inclusion**.** Only in-service health professionals were included. Pre-service mentees or mentors were not considered for inclusion**.** Intervention Mentorship program of any type were considered for inclusion. Mentorship is defined as ‘a flexible learning and teaching process that serves specific objectives of a health program’ [24]. This review did not include supervision as an intervention. This is because supervision is technically different from mentorship as outlined earlier [12]. The review did not consider mentorship programs and interventions conducted during pre-service training. It did not include preceptorship interventions or orientations for newly hired professionals. Comparator This review considered studies that compared mentorship interventions to programs without mentorship or studies that compared different approaches of mentorship. Outcomes The review considered studies that include the following outcomes: competence (knowledge and skills, adherence to standard protocols), and institutional/staff performance. Patient outcomes were not included in the review. Context This review considered mentorship interventions conducted in healthcare facilities in all African countries. **(Pages 4-5).** |  |
| Information sources | 7 | Both published and unpublished papers reported in English were searched with no restriction according to age, country and date of publication. The databases searched were: EMBASE, CINAHL, CENTRAL and MEDLINE. Additional search was conducted in Google Scholar. **(page 5)** |  |
| Search | 8 | A detailed search strategy for each database is reported in supplementary file (**S1** **Table**). |  |
| Study selection | 9 | All records identified through the search process were loaded into EndNote and duplicates were removed. Two independent reviewers read titles and abstracts of the papers for assessment against the inclusion criteria for the review. Following that, the two independent reviewers assessed full texts of potentially eligible studies in detail against the inclusion criteria. **(Page 7).** |  |
| Data collection process | 10 | Quantitative data were extracted from papers included in the review using the standardized data extraction tool developed by the JBI (S2 Doc). Relevant information such as population characteristics, publication year, authors, intervention type and summary of the findings were extracted. Where necessary, we asked the first authors to provide additional information on the articles. Narrative synthesis of the findings was carried out to address the review questions under relevant thematic areas. Summary tables are provided as appropriate. **(Page 7)** |  |
| Data items | 11 | The review considered studies that include the following outcomes: competence (knowledge and skills, adherence to standard protocols), and institutional/staff performance. Patient outcomes were not included in the review. **(Page 5)** |  |
| Risk of bias in individual studies | 12 | The papers retrieved were critically appraised by two reviewers independently using the Joanna Briggs Institute (JBI) appraisal checklists (S1 Doc). Any potential disagreements were settled by discussion. Since there was no unsettled dispute between the two reviewers, there was no need a third reviewer. (**Page 8)** |  |
| Summary measures | 13 | Summary measures used in this review were mean difference, relative risk, and their confidence intervals. (**Pages 11-18)** . |  |
| Synthesis of results | 14 | Since the intervention methods, outcomes and populations of interests were heterogeneous, narrative synthesis of the findings was carried out to address the review questions under relevant thematic areas. (**Page 7)** |  |

Page 1 of 2

| **Section/topic** | **#** | **Checklist item** | **Reported on page #** |
| --- | --- | --- | --- |
| Risk of bias across studies | 15 |  |  |
| Additional analyses | 16 | NA |  |
| **RESULTS** | | |  |
| Study selection | 17 | We have presented the numbers of studies screened, assessed for eligibility, and included in the review in a flow diagram (**Figure** **1**).(**Page** 7) |  |
| Study characteristics | 18 | We have presented the characteristics of each included study (including their citation details, sample size and characteristics, PICOS, methodological quality, follow-up period and major findings. (**Pages** **10**-**13**) |  |
| Risk of bias within studies | 19 | The outcomes were measured differently across different studies and across different areas of practice, such as; Laboratory quality accreditations, institutional performance management, infectious disease management, maternal and child health services, family planning. Since outcome measurements were heterogeneous across different studies, GRADE assessment was not conducted. (**Pages 9)** |  |
| Results of individual studies | 20 | Though meta-analysis was not practical because of heterogeneity of studies, for each study, we have presented summary data for each intervention group (b) effect estimates and confidence intervals. (**Pages 10-22)** |  |
| Synthesis of results | 21 | NA |  |
| Risk of bias across studies | 22 | Since outcome measurements were heterogeneous across different studies, GRADE assessment was not conducted. **(Page 7 and page 25)** |  |
| Additional analysis | 23 | NA |  |
| **DISCUSSION** | | |  |
| Summary of evidence | 24 | Strength of evidence, implications for policy and practice have been presented (**Pages** **25**) |  |
| Limitations | 25 | Limitations of the review at study level (risk of bias), at intervention level (different studies implemented interventions differently), at outcomes level (outcomes were measured differently across the included studies) were discussed. Additionally limitations related to the consideration of contextual factors were discussed. (**Page 24)** |  |
| Conclusions | 26 | Mentorship interventions may be used to increase adherence of health professionals to guidelines, standards and protocols. While different types of interventions (embedded mentoring, visits by mobile mentors, facility twinning and within-facility mentorship by a focal person) were reported to be effective, there is no evidence to support recommendation of one model of mentorship over other approaches.  Further research is also needed to compare the cost effectiveness of mentorship interventions. The health systems structures and resources—resources, institutional mechanisms to support career progression—mentorship need to be captured as well given their significance for the outcomes. Moreover, the feasibility, applicability and meaningfulness of mentoring interventions to different participants and contexts should be further investigated.(**Page 25** |  |
| **FUNDING** | | |  |
| Funding | 27 | The authors are grateful to Jimma University Rapid Review Response Center: AHPSR/WHO Center of Excellence for sponsoring this review. |  |

*From:*  Moher D, Liberati A, Tetzlaff J, Altman DG, The PRISMA Group (2009). Preferred Reporting Items for Systematic Reviews and Meta-Analyses: The PRISMA Statement. PLoS Med 6(7): e1000097. doi:10.1371/journal.pmed1000097

For more information, visit: **www.prisma-statement.org**.

Page 2 of 2

# Supplementary material 2

MEDLINE (via PubMed) conducted on 07/02/2018

| **PubMed searched on 16/02/208** | | | |
| --- | --- | --- | --- |
| **Search** | | **Query** | **Records retrieved** |
| #1 | | "Mentors"[Mesh] | 9432 |
| #2 | | “Educational outreach”[tw] | 438 |
| #3 | | “Onsite training”[tw] | 28 |
| #4 | | "mentors"[tw] OR "mentor"[tw] | 13230 |
| #5 | | (("Africa"[Mesh] OR "Africa South of the Sahara"[Mesh] OR "South Africa"[Mesh] OR "Africa, Western"[Mesh] OR "Africa, Southern"[Mesh] OR "Africa, Northern"[Mesh] OR "Africa, Eastern"[Mesh] OR "Africa, Central"[Mesh] OR "Namibia"[Mesh] OR "Mozambique"[Mesh])) | 230331 |
| #6 | | #1 OR #2 OR #3 OR #4 | 13694 |
| #7 | | #5 AND #6 | 230 |
| Limited to English language AND Humans | | | 212 |
| **CINAHL searched on 07/02/18** | | | |
| #1 | (MH "Mentorship") | | 9803 |
| #2 | “Onsite training”[TI] | | 66 |
| #3 | “educational outreach”[TI] | | 46 |
| #4 | Mentor [TI] OR Mentorship[TI] | | 1422 |
| #5 | MH "Africa") OR (MH "Africa South of the Sahara") OR (MH "Democratic Nursing Organisation of South Africa") OR (MH "Africa, Central") OR (MH "Africa, Northern") OR (MH "South African Nursing Council") OR (MH "South Africa") | | 17078 |
| #6 | #1 OR #2 OR #3 OR #4 | | 10168 |
| #7 | #5 AND #6 | | 51 |
| Exclude MEDLINE AND limit to human AND English | | | 18 |
| **EMBASE searched on 08/02/18** | | | |
| #1 | Mentorship/exp | | 1382 |
| #2 | Mentorship:ti | | 1164 |
| #3 | mentor:ti | | 820 |
| #4 | “educational outreach”:ti | | 113 |
| #5 | ‘Onsite training’:ti | | 4 |
| #6 | 'Africa'/exp | | 284,558 |
| #7 | #1 OR #2 OR #3 OR #4 OR #5 | | 3284 |
| #8 | #6 AND #7 | | 120 |
| #8 AND [humans]/lim AND [english]/lim AND [embase]/lim | | | 92 |
| **COCHRANE CENTRAL searched on 09/02/18** | | | |
| #1 | MeSH descriptor: [Mentoring] explode all trees | | 44 |
| #2 | Mentorship | | 129 |
| #3 | Mentor | | 391 |
| #4 | onsite training | | 81 |
| #5 | educational outreach | | 498 |
| #6 | MeSH descriptor: [Mentors] explode all trees | | 189 |
| #7 | MeSH descriptor: [Africa] explode all trees | | 6294 |
| #8 | #1 or #2 or #3 or #4 or #5 or #6 | | 1154 |
| #9 | #7 and #8 in Trials | | 30 |
